# Supplementary material
Source: PubMed Central journal article supplement (PMC9077058)
Supplement: ajcr0012-1752-f8.pdf [file ajcr0012-1752-f8.pdf]

## Molecular features involved in HCC prognosis

**Supplementary Table 1.** Part of significant-enriched pathways in Short-term through GSEA analysis

| Enrichment pathways      | Normalized Enrichment Score (NES) | NOM p-val   | FDR q-val   |
|--------------------------|-----------------------------------|-------------|-------------|
| Ribosome                 | -1.7009071                        | 0           | 0.005358497 |
| Proteasome               | -1.6258279                        | 0           | 0.017680043 |
| ECM-receptor interaction | -1.5425298                        | 0.001121076 | 0.1031432   |

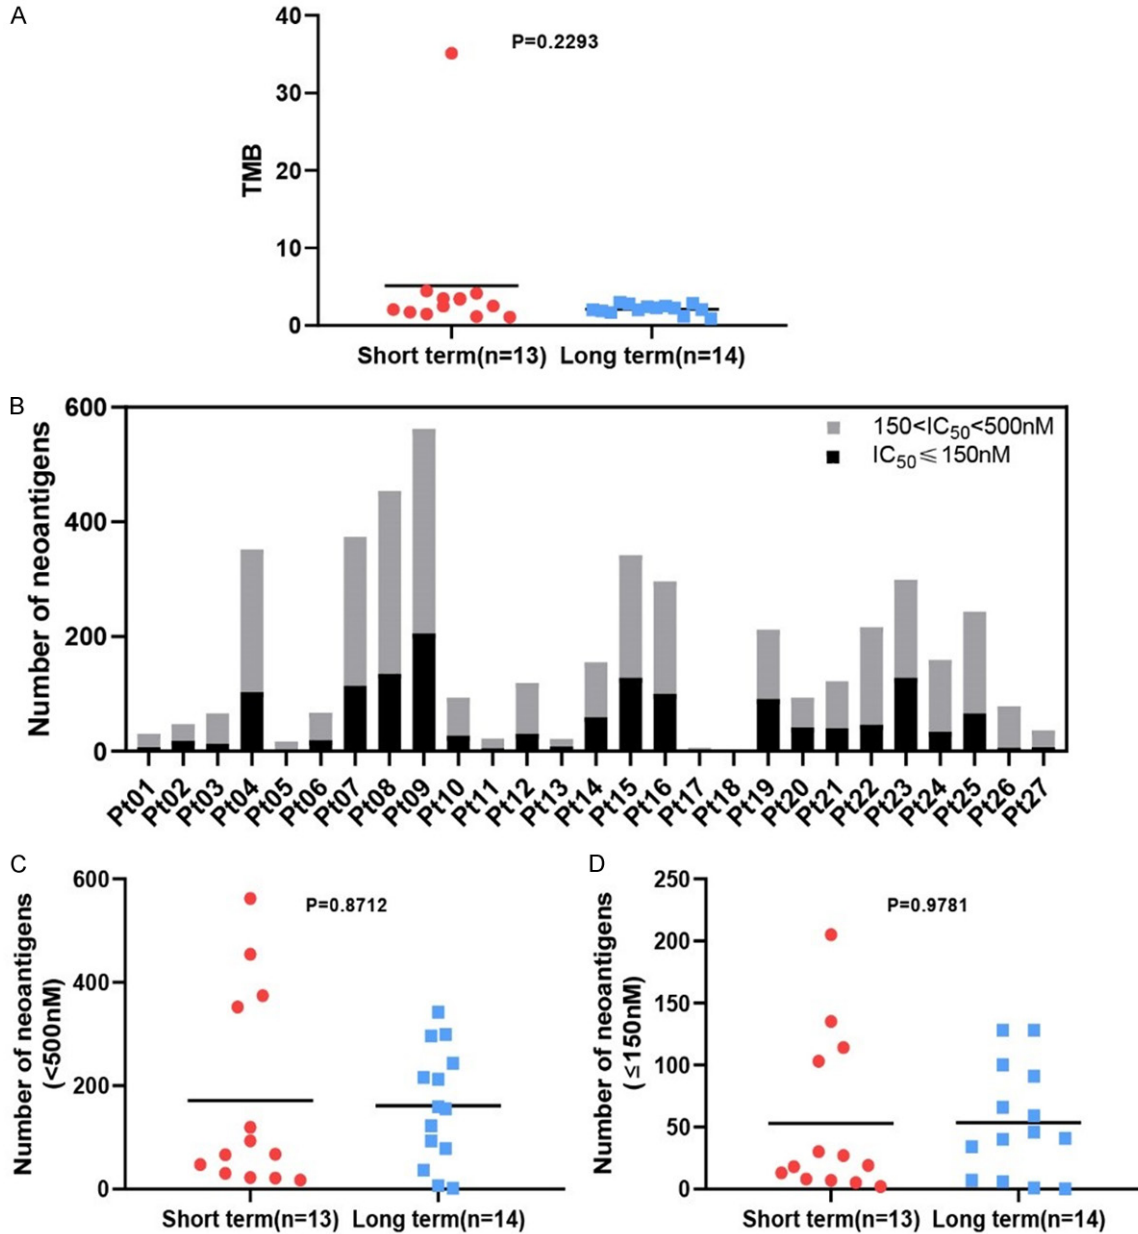

**Supplementary Figure 1.** TMB, neoantigen load comparison between Long-term and Short-term. A. TMB comparison between Long-term and Short-term,  $P = 0.2293$ . B. Neoantigen number per patient in Pt01~Pt27. C. Total neoantigen ( $IC_{50} < 500$  nM) load comparison between Long-term and Short-term. D. High-quality neoantigen ( $IC_{50} \leq 150$  nM) load comparison between Long-term and Short-term.

## Molecular features involved in HCC prognosis

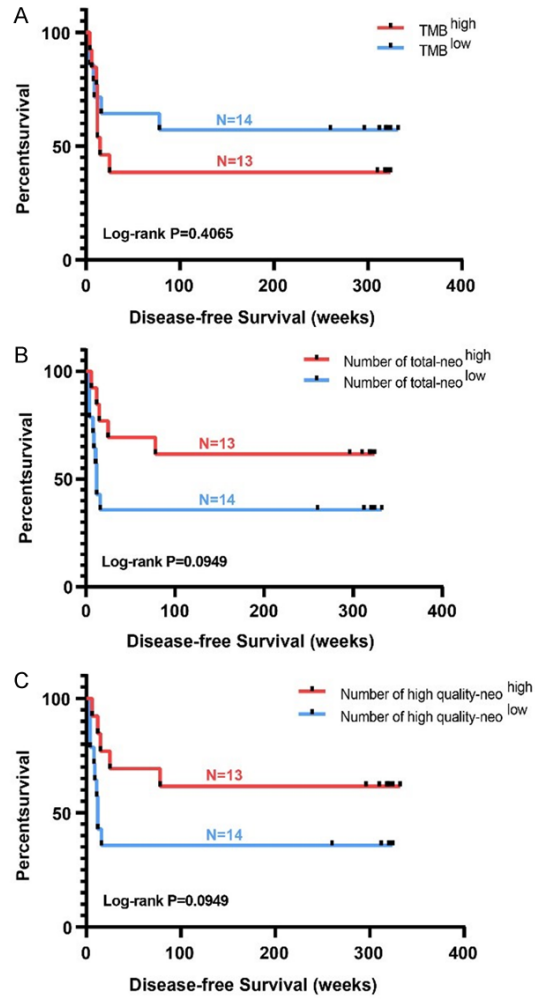

**Supplementary Figure 2.** Correlation between TMB, neoantigen load and prognosis. A. TMB and prognosis, P = 0.4065. B. Total neoantigen ( $IC_{50} < 500$  nM) load and prognosis, P = 0.0949. C. High-quality neoantigen ( $IC_{50} \leq 150$  nM) load and prognosis, P = 0.0949.

## Molecular features involved in HCC prognosis

**Supplementary Table 3.** Clinical variables included in univariate-Cox proportional hazards model

| Factor                         | HR     | 95% CI        | P value |
|--------------------------------|--------|---------------|---------|
| Neutrophil ratio               | 13.600 | 0.267-696.000 | 0.1930  |
| Tumor thrombus                 | 4.070  | 1.120-14.800  | 0.0329  |
| Albumin/Globulin ratio         | 1.430  | 0.209-9.790   | 0.7150  |
| Family history of liver cancer | 1.350  | 0.467-3.890   | 0.5810  |
| Diabete                        | 0.000  | 0.000-Inf     | 0.9980  |
| Thrombocytocrit (%)            | 1.210  | 0.083-17.500  | 0.8900  |
| Alcohol                        | 1.170  | 0.391-3.500   | 0.7790  |
| Prothrombin time (s)           | 1.160  | 0.564-2.390   | 0.6850  |
| Gender                         | 1.120  | 0.313-4.050   | 0.8570  |
| AST (U/L)                      | 1.020  | 1.000-1.030   | 0.0188  |
| Neutrophil number (/L)         | 1.020  | 0.784-1.320   | 0.8940  |
| DBIL (umol/L)                  | 1.010  | 1.000-1.020   | 0.0023  |
| ALT (U/L)                      | 1.010  | 1.000-1.020   | 0.0336  |
| ALP (U/L)                      | 1.010  | 1.000-1.020   | 0.0020  |
| TBIL (umol/L)                  | 1.010  | 1.000-1.010   | 0.0027  |
| AFP (nk/mL)                    | 1.000  | 1.000-1.000   | 0.0201  |
| CHE (U/L)                      | 1.000  | 0.999-1.000   | 0.0475  |
| Platelet number (/L)           | 1.000  | 0.998-1.010   | 0.1580  |
| Neutrophil/Lymphocyte Ratio    | 0.997  | 0.862-1.150   | 0.9700  |
| Hemoglobin (g/L)               | 0.985  | 0.955-1.020   | 0.3470  |
| CRE (umol/L)                   | 0.981  | 0.948-1.020   | 0.2770  |
| Age                            | 0.980  | 0.922-1.040   | 0.4990  |
| Leukocyte number (/L)          | 0.964  | 0.743-1.250   | 0.7840  |
| Smoke                          | 0.964  | 0.322-2.890   | 0.9480  |
| Prothrombin activity           | 0.957  | 0.889-1.030   | 0.2340  |
| Albumin (g/L)                  | 0.938  | 0.798-1.100   | 0.4370  |
| Globulin (g/L)                 | 0.914  | 0.787-1.060   | 0.2370  |
| TP (g/L)                       | 0.913  | 0.813-1.030   | 0.1270  |
| Erythrocyte number (/L)        | 0.887  | 0.285-2.770   | 0.8370  |
| Lymphocyte number (/L)         | 0.784  | 0.369-1.670   | 0.5270  |
| BUN (mmol/L)                   | 0.765  | 0.465-1.260   | 0.2920  |
| Antiviral therapy              | 0.679  | 0.227-2.030   | 0.4890  |
| Monocyte number (/L)           | 0.176  | 0.006-5.350   | 0.3190  |
| Virus                          | 0.049  | 0.004-0.571   | 0.0160  |
| Lymphocyte ratio               | 0.040  | 0.000-4.930   | 0.1900  |

Abbreviations: AST, Aspartate Aminotransferase; DBIL, Direct bilirubin; ALT, Alanine transaminase; ALP, Alkaline phosphatase; TBIL, Total bilirubin; AFP, Alpha fetoprotein; CHE, Cholinesterase; CRE, Creatinine; TP, Total protein; BUN, Blood urea nitrogen.
